# Supplementary material for: Ecological Factors and Anthropogenic Disturbance May Restructure the Skin Microbiota of Maoershan Hynobiids (Hynobius maoershanensis)
Source: MDPI journal article supplement (doi:10.3390/d15080932), 2023-08-15
Supplement: s1 [file s1]

## Supplementary Material

### Ecological Factors and Anthropogenic Disturbance May Restructure the Skin Microbiota of the Maoershan Hynobiids (*Hynobius maoershanensis*)

Huiqun Chen, Yingying Huang, Guangyan Pang, Zhenzhen Cui, Zhengjun Wu, Huayuan Huang

Correspondence: Huayuan Huang: huanghuayuan6@sina.cn

#### Supplementary Table

Table S1. Data of ecological factors and anthropogenic disturbance in Maoershan hynobiids habitats (the values of each factor are the mean).

| Date    | Sample code  | Tourist number | Habitat | Air temperature/°C | Humidity | Water temperature/°C | Water pH | Water depth/cm | Stage              |
|---------|--------------|----------------|---------|--------------------|----------|----------------------|----------|----------------|--------------------|
| 2021.01 | sample 1-5   | 219            | HADD    | 3.8                | 0.59     | -0.3                 | 7.6      | 5.9            | adult              |
| 2021.04 | sample 6-19  | 245            | HADD    | 13.6               | 0.99     | 12.9                 | 5.79     | 16.5           | forelimb bud stage |
| 2021.04 | sample 20-29 | 1              | LADD    | 14.2               | 0.99     | 11.9                 | 5.69     | 21             | forelimb bud stage |
| 2021.07 | sample 30-32 | 407            | HADD    | 17.9               | 0.99     | 16.1                 | 5.61     | 24             | hindlimb bud stage |
| 2021.07 | sample 33-35 | 1              | LADD    | 20.3               | 0.94     | 15.4                 | 6.09     | 20             | hindlimb bud stage |
| 2022.01 | sample 36-40 | 1              | LADD    | 8.4                | 0.99     | 6.2                  | 6.97     | 20.9           | adult              |
| 2022.01 | sample 41-55 | 222            | HADD    | 9.5                | 0.86     | 6.1                  | 6.19     | 23.5           | adult              |
| 2022.04 | sample 56-59 | 16             | HADD    | 33.5               | 0.42     | 10.1                 | 6.06     | 10             | forelimb bud stage |
| 2022.04 | sample 60    | 1              | LADD    | 17.7               | 0.60     | 14.8                 | 5.93     | 15.5           | forelimb bud stage |
| 2022.07 | sample 61-64 | 1              | LADD    | 34.4               | 0.67     | 19                   | 5.91     | 13.5           | hindlimb bud stage |
| 2022.07 | sample 65-67 | 240            | HADD    | 21.5               | 0.85     | 16                   | 6.23     | 12.5           | hindlimb bud stage |

Table S2. Results of the Spearman's rank test between skin microbiota of adult and ecological factors and anthropogenic disturbance

|                  |   | Anthropogenic<br>disturbance | Air<br>temperature | Water<br>temperature | Humidity | Water pH | Water<br>depth | Different<br>habitats |
|------------------|---|------------------------------|--------------------|----------------------|----------|----------|----------------|-----------------------|
| ACE              | r | -0.541**                     | -0.708**           | -0.317               | -0.317   | 0.708**  | -0.708**       | -0.141                |
|                  | p | 0.006                        | <0.001             | 0.131                | 0.131    | <0.001   | <0.001         | 0.512                 |
| Chao             | r | -0.541**                     | -0.708**           | -0.317               | -0.317   | 0.708**  | -0.708**       | -0.141                |
|                  | p | 0.006                        | <0.001             | 0.131                | 0.131    | <0.001   | <0.001         | 0.512                 |
| Shannon          | r | -0.347                       | -0.548**           | -0.382               | -0.382   | 0.548**  | -0.548**       | 0.022                 |
|                  | p | 0.097                        | 0.006              | 0.065                | 0.065    | 0.006    | 0.006          | 0.918                 |
| Simpson          | r | 0.172                        | 0.417*             | 0.466*               | 0.466*   | -0.417*  | 0.417*         | -0.185                |
|                  | p | 0.422                        | 0.043              | 0.022                | 0.022    | 0.043    | 0.043          | 0.386                 |
| Actinobacteriota | r | 0.594**                      | 0.442*             | -0.289               | -0.289   | -0.442*  | 0.442*         | 0.556**               |
|                  | p | 0.002                        | 0.03               | 0.171                | 0.171    | 0.03     | 0.03           | 0.005                 |
| Bacteroidota     | r | -0.621**                     | -0.557**           | 0.121                | 0.121    | 0.557**  | -0.557**       | -0.467*               |
|                  | p | 0.001                        | 0.005              | 0.572                | 0.572    | 0.005    | 0.005          | 0.021                 |
| Firmicutes       | r | -0.538**                     | -0.616**           | -0.149               | -0.149   | 0.616**  | -0.616**       | -0.245                |
|                  | p | 0.007                        | 0.001              | 0.487                | 0.487    | 0.001    | 0.001          | 0.249                 |
| Proteobacteria   | r | 0.629**                      | 0.408*             | -0.420*              | -0.420*  | -0.408*  | 0.408*         | 0.660**               |
|                  | p | 0.001                        | 0.048              | 0.041                | 0.041    | 0.048    | 0.048          | <0.001                |
| Pseudomonadaceae | r | 0.815**                      | 0.693**            | -0.233               | -0.233   | -0.693** | 0.693**        | 0.660**               |
|                  | p | <0.001                       | <0.001             | 0.273                | 0.273    | <0.001   | <0.001         | <0.001                |
| Aeromonadaceae   | r | -0.432*                      | -0.369             | 0.121                | 0.121    | 0.369    | -0.369         | -0.348                |
|                  | p | 0.035                        | 0.076              | 0.573                | 0.573    | 0.076    | 0.076          | 0.095                 |
| Comamonadaceae   | r | 0.401                        | 0.356              | -0.084               | -0.084   | -0.356   | 0.356          | 0.305                 |
|                  | p | 0.052                        | 0.087              | 0.695                | 0.695    | 0.087    | 0.087          | 0.147                 |
| Burkholderiaceae | r | 0.623**                      | 0.461*             | -0.308               | -0.308   | -0.461*  | 0.461*         | 0.585**               |
|                  | p | 0.001                        | 0.023              | 0.144                | 0.144    | 0.023    | 0.023          | 0.003                 |

Table S3. Results of the Spearman's rank test between skin microbiota of hindlimb bud stage tadpoles and ecological factors and anthropogenic disturbance

|                  |   | Anthropogenic<br>disturbance | Air<br>temperature | Water<br>temperature | Humidity | Water<br>pH | Water<br>depth | Different<br>habitats |
|------------------|---|------------------------------|--------------------|----------------------|----------|-------------|----------------|-----------------------|
| ACE              | r | 0.642*                       | -0.465             | 0.011                | 0.465    | -0.283      | 0.283          | 0.577*                |
|                  | p | 0.018                        | 0.11               | 0.971                | 0.11     | 0.348       | 0.348          | 0.039                 |
| Chao             | r | 0.642*                       | -0.465             | 0.011                | 0.465    | -0.283      | 0.283          | 0.577*                |
|                  | p | 0.018                        | 0.11               | 0.971                | 0.11     | 0.348       | 0.348          | 0.039                 |
| Shannon          | r | 0.369                        | -0.249             | 0.397                | 0.249    | -0.635*     | 0.442          | 0.206                 |
|                  | p | 0.214                        | 0.411              | 0.179                | 0.411    | 0.020       | 0.130          | 0.499                 |
| Simpson          | r | -0.399                       | 0.122              | -0.575*              | -0.122   | 0.677*      | -0.343         | -0.247                |
|                  | p | 0.176                        | 0.692              | 0.040                | 0.692    | 0.011       | 0.251          | 0.415                 |
| Actinobacteriota | r | 0.133                        | 0.598*             | 0.411                | -0.598*  | 0.337       | -0.796**       | 0.33                  |
|                  | p | 0.665                        | 0.031              | 0.163                | 0.031    | 0.26        | 0.001          | 0.271                 |
| Bacteroidota     | r | -0.623*                      | 0.247              | 0.094                | -0.247   | -0.128      | 0.156          | -0.701**              |
|                  | p | 0.023                        | 0.417              | 0.761                | 0.417    | 0.678       | 0.611          | 0.008                 |
| Campilobacterota | r | 0.685**                      | -0.391             | 0.379                | 0.391    | -0.630*     | 0.415          | 0.543                 |
|                  | p | 0.01                         | 0.186              | 0.201                | 0.186    | 0.021       | 0.158          | 0.055                 |
| Proteobacteria   | r | -0.163                       | 0.196              | -0.315               | -0.196   | 0.570*      | -0.451         | 0                     |
|                  | p | 0.594                        | 0.522              | 0.295                | 0.522    | 0.042       | 0.122          | 1                     |
| Pseudomonadaceae | r | 0.284                        | 0.13               | 0.045                | -0.13    | 0.266       | -0.414         | 0.412                 |
|                  | p | 0.346                        | 0.671              | 0.883                | 0.671    | 0.379       | 0.16           | 0.161                 |
| Aeromonadaceae   | r | 0.589*                       | -0.05              | 0.419                | 0.05     | -0.283      | -0.055         | 0.579*                |
|                  | p | 0.034                        | 0.872              | 0.154                | 0.872    | 0.349       | 0.857          | 0.038                 |
| Comamonadaceae   | r | 0.357                        | -0.19              | 0.201                | 0.19     | -0.315      | 0.196          | 0.289                 |
|                  | p | 0.231                        | 0.534              | 0.51                 | 0.534    | 0.295       | 0.522          | 0.339                 |
| Burkholderiaceae | r | -0.157                       | -0.516             | -0.499               | 0.516    | -0.13       | 0.607*         | -0.289                |
|                  | p | 0.608                        | 0.071              | 0.083                | 0.071    | 0.671       | 0.028          | 0.339                 |

Table S4. Results of the Spearman's rank test between skin microbiota of forelimb bud stage tadpoles and ecological factors and anthropogenic disturbance

|                  |   | Anthropogenic<br>disturbance | Air<br>temperature | Water<br>temperature | Humidity | Water<br>pH | Water<br>depth | Different<br>habitats |
|------------------|---|------------------------------|--------------------|----------------------|----------|-------------|----------------|-----------------------|
| ACE              | r | 0.141                        | −0.456*            | 0.286                | 0.625**  | −0.429*     | 0.429*         | −0.084                |
|                  | p | 0.458                        | 0.011              | 0.125                | <0.001   | 0.018       | 0.018          | 0.659                 |
| Chao             | r | 0.17                         | −0.484**           | 0.314                | 0.635**  | −0.416*     | 0.416*         | −0.06                 |
|                  | p | 0.368                        | 0.007              | 0.091                | <0.001   | 0.022       | 0.022          | 0.753                 |
| Shannon          | r | 0.460*                       | −0.572**           | 0.374*               | 0.449*   | −0.064      | 0.064          | 0.308                 |
|                  | p | 0.010                        | 0.001              | 0.042                | 0.013    | 0.738       | 0.738          | 0.098                 |
| Simpson          | r | −0.592**                     | 0.642**            | −0.446*              | −0.406*  | −0.066      | 0.066          | −0.452*               |
|                  | p | 0.001                        | <0.001             | 0.014                | 0.026    | 0.728       | 0.728          | 0.012                 |
| Actinobacteriota | r | 0.104                        | 0.295              | −0.136               | −0.648** | 0.623**     | 0.623**        | 0.332                 |
|                  | p | 0.585                        | 0.114              | 0.473                | <0.001   | <0.001      | <0.001         | 0.073                 |
| Firmicutes       | r | 0.129                        | −0.133             | −0.05                | 0.13     | −0.05       | 0.05           | 0.124                 |
|                  | p | 0.496                        | 0.483              | 0.792                | 0.495    | 0.792       | 0.792          | 0.514                 |
| Fusobacteriota   | r | 0.096                        | −0.305             | 0.155                | 0.430*   | −0.304      | 0.304          | −0.049                |
|                  | p | 0.615                        | 0.101              | 0.414                | 0.018    | 0.103       | 0.103          | 0.799                 |
| Proteobacteria   | r | 0.108                        | −0.187             | 0.198                | 0.168    | −0.051      | 0.051          | 0.028                 |
|                  | p | 0.569                        | 0.323              | 0.295                | 0.376    | 0.791       | 0.791          | 0.883                 |
| Pseudomonadaceae | r | 0.541**                      | −0.710**           | 0.506**              | 0.577**  | 0.107       | 0.107          | 0.332                 |
|                  | p | 0.002                        | < 0.001            | 0.004                | 0.001    | 0.574       | 0.574          | 0.073                 |
| Comamonadaceae   | r | −0.739**                     | 0.710**            | −0.516**             | −0.343   | 0.225       | 0.225          | −0.619**              |
|                  | p | <0.001                       | <0.001             | 0.003                | 0.064    | 0.233       | 0.233          | <0.001                |
| Burkholderiaceae | r | 0.871**                      | −0.790**           | 0.611**              | 0.312    | 0.348       | −0.348         | 0.755**               |
|                  | p | <0.001                       | <0.001             | <0.001               | 0.093    | 0.059       | 0.059          | <0.001                |
| Clostridiaceae   | r | 0.169                        | −0.143             | 0.067                | 0.059    | 0.059       | 0.059          | 0.16                  |
|                  | p | 0.372                        | 0.452              | 0.727                | 0.757    | 0.756       | 0.756          | 0.399                 |
